# Supplementary material
Source: PubMed Central journal article supplement (PMC7457948)
Supplement: ry192429suppa1.pdf [file ry192429suppa1.pdf]

## Appendix E1

**Extended output for Table 3. All models were fit using the REML estimation approach.**

Outcome: Adjusted lung density;  $n = 6136$  records used for analysis

### Covariance Parameter Estimates (1 and 2 in parentheses refer to Phases)

| Covariance Parameter |               | Estimate |
|----------------------|---------------|----------|
| Study center         |               | 9.9585   |
| Scanner model        |               | 66.1656  |
| UN (1,1)             | Subject level | 200.78   |
| UN (2,1)             | Subject level | 167.85   |
| UN (2,2)             | Subject level | 220.67   |

### Fixed parameter (Beta) estimates

| Effect*                      | Estimate | SE      | DF   | t Value | Pr >  t | 95% CI, lower | 95% CI, upper |
|------------------------------|----------|---------|------|---------|---------|---------------|---------------|
| Intercept                    | 192.45   | 6.5437  | 14   | 29.41   | <0.0001 | 178.41        | 206.48        |
| Phase (1)                    | 3.0831   | 0.3838  | 6089 | 8.03    | <0.0001 | 2.3307        | 3.8355        |
| Emphysema (absent)           | 0.2433   | 0.5641  | 6089 | 0.43    | 0.6663  | -0.8625       | 1.3491        |
| Phase (1)*Emphysema (absent) | -2.8661  | 0.4106  | 6089 | -6.98   | <0.0001 | -3.6710       | -2.0611       |
| Age, years                   | -0.00339 | 0.03167 | 6089 | -0.11   | 0.9148  | -0.06548      | 0.05870       |
| Height, cm                   | -0.7198  | 0.03234 | 6089 | -22.26  | <0.0001 | -0.7832       | -0.6564       |
| Gender (Male)                | -8.1887  | 0.5971  | 6089 | -13.71  | <0.0001 | -9.3592       | -7.0183       |
| Race (White)                 | -6.8008  | 0.5757  | 6089 | -11.81  | <0.0001 | -7.9294       | -5.6722       |
| Smoking status (former)      | -11.9870 | 0.5571  | 6089 | -21.52  | <0.0001 | -13.0790      | -10.8950      |
| Scanner make (GE)**          | 7.5856   | 4.5424  | 6089 | 1.67    | 0.0950  | -1.3190       | 16.4903       |
| Scanner make (Phillips)**    | 11.6787  | 6.5290  | 6089 | 1.79    | 0.0737  | -1.1204       | 24.4778       |
| B35f_flag (no)               | 2.2518   | 1.3660  | 6089 | 1.65    | 0.0993  | -0.4261       | 4.9296        |
| Weight, kg                   | 0.3603   | 0.01190 | 6089 | 30.28   | <0.0001 | 0.3370        | 0.3837        |

\* Predictors followed by a level in parentheses are indicators; the estimate represents the average change in the outcome for that level compared with the reference level. Other predictors are continuous.

\*\* Siemens is reference.

### Type 3 Tests of Fixed Effects (for nonbinary class variables)

| Effect       | Num DF | Den DF | F Value | Pr > F |
|--------------|--------|--------|---------|--------|
| Scanner make | 2      | 6089   | 2.29    | 0.1016 |

### Estimates

| Label                           | Estimate | SE     | DF   | t Value | Pr >  t | 95% CI, lower | 95% CI, upper |
|---------------------------------|----------|--------|------|---------|---------|---------------|---------------|
| Change for 'no emphysema' group | -0.2170  | 0.3569 | 6089 | -0.61   | 0.5432  | -0.9168       | 0.4827        |
| Change for 'emphysema' group    | -3.0831  | 0.3838 | 6089 | -8.03   | <0.0001 | -3.8355       | -2.3307       |

## Least squares means for Phase\*Emphysema categories

| Phase | Emphysema (0 = abs, 1 = present) | Estimate | SE     | DF   | t Value | Pr >  t | 95% CI, lower | 95% CI, upper |
|-------|----------------------------------|----------|--------|------|---------|---------|---------------|---------------|
| 1     | 0                                | 94.6479  | 2.6480 | 6089 | 35.74   | <0.0001 | 89.4568       | 99.8390       |
| 1     | 1                                | 97.2707  | 2.6440 | 6089 | 36.79   | <0.0001 | 92.0876       | 102.45        |
| 2     | 0                                | 94.4309  | 2.6587 | 6089 | 35.52   | <0.0001 | 89.2188       | 99.6429       |
| 2     | 1                                | 94.1876  | 2.6622 | 6089 | 35.38   | <0.0001 | 88.9688       | 99.4064       |

Outcome: Perc15; r = 6136

## Covariance Parameter Estimates

| Covariance Parameter | Estimate |
|----------------------|----------|
| Study center         | 22.5412  |
| Scanner model        | 55.3328  |
| Subject              | 225.09   |
| Residual             | 128.31   |

Note.—Compound symmetric structure used alternatively to including a random intercept for subjects, allowing convergence.

## Fixed parameter (Beta) estimates

| Effect*                      | Estimate | SE      | DF   | t Value | Pr >  t | 95% CI, lower | 95% CI, upper |
|------------------------------|----------|---------|------|---------|---------|---------------|---------------|
| Intercept                    | 153.80   | 8.2264  | 14   | 18.70   | <0.0001 | 136.16        | 171.45        |
| Phase (1)                    | 3.3069   | 0.6110  | 6089 | 5.41    | <0.0001 | 2.1090        | 4.5048        |
| Emphysema (absent)           | 1.9721   | 0.7714  | 6089 | 2.56    | 0.0106  | 0.4599        | 3.4842        |
| Phase (1)*Emphysema (absent) | -3.0117  | 0.6875  | 6089 | -4.38   | <0.0001 | -4.3593       | -1.6640       |
| Age, years                   | -0.1104  | 0.04071 | 6089 | -2.71   | 0.0067  | -0.1902       | -0.03060      |
| Height, cm                   | -0.4379  | 0.04272 | 6089 | -10.25  | <0.0001 | -0.5217       | -0.3542       |
| Gender (Male)                | -11.7491 | 0.7729  | 6089 | -15.20  | <0.0001 | -13.2644      | -10.2339      |
| Race (White)                 | -8.9692  | 0.7427  | 6089 | -12.08  | <0.0001 | -10.4252      | -7.5132       |
| Smoking status (former)      | -9.8524  | 0.7152  | 6089 | -13.78  | <0.0001 | -11.2545      | -8.4503       |
| Scanner make (GE)**          | 6.3334   | 4.3183  | 6089 | 1.47    | 0.1425  | -2.1320       | 14.7988       |
| Scanner make (Phillips)**    | 8.3404   | 6.8376  | 6089 | 1.22    | 0.2226  | -5.0637       | 21.7446       |
| B35f_flag (no)               | -0.4584  | 2.0589  | 6089 | -0.22   | 0.8238  | -4.4946       | 3.5777        |
| Weight, kg                   | 0.3949   | 0.01618 | 6089 | 24.40   | <0.0001 | 0.3632        | 0.4266        |

\* Predictors followed by a level in parentheses are indicators; the estimate represents the average change in the outcome for that level compared with the reference level. Other predictors are continuous.

\*\* Siemens is reference.

## Type 3 Tests of Fixed Effects

| Effect       | Num DF | Den DF | F Value | Pr > F |
|--------------|--------|--------|---------|--------|
| Scanner make | 2      | 6089   | 1.42    | 0.2419 |

## Estimates

| Label                           | Estimate | SE     | DF   | t Value | Pr >  t | 95% CI, lower | 95% CI, upper |
|---------------------------------|----------|--------|------|---------|---------|---------------|---------------|
| Change for 'no emphysema' group | -0.2953  | 0.5650 | 6089 | -0.52   | 0.6013  | -1.4029       | 0.8124        |
| Change for 'emphysema' group    | -3.3069  | 0.6110 | 6089 | -5.41   | <0.0001 | -4.5048       | -2.1090       |

### Least squares means for Phase\*Emphysema categories

| Phase | Emphysema (0 = abs, 1 = present) | Estimate | SE     | DF   | t Value | Pr >  t | 95% CI, lower | 95% CI, upper |
|-------|----------------------------------|----------|--------|------|---------|---------|---------------|---------------|
| 1     | 0                                | 97.6354  | 2.9027 | 6089 | 33.64   | <0.0001 | 91.9451       | 103.33        |
| 1     | 1                                | 98.6750  | 2.8951 | 6089 | 34.08   | <0.0001 | 92.9995       | 104.35        |
| 2     | 0                                | 97.3402  | 2.9234 | 6089 | 33.30   | <0.0001 | 91.6092       | 103.07        |
| 2     | 1                                | 95.3681  | 2.9305 | 6089 | 32.54   | <0.0001 | 89.6232       | 101.11        |

Outcome: lnLAA950; r = 6136

### Covariance Parameter Estimates (1 and 2 in parentheses refer to Phases)

| Covariance Parameter |               | Estimate |
|----------------------|---------------|----------|
| Study center         |               | 0.1363   |
| Scanner model        |               | 0.5221   |
| UN (1,1)             | Subject level | 1.2183   |
| UN (2,1)             | Subject level | 0.9255   |
| UN (2,2)             | Subject level | 1.5587   |

### Fixed parameter (Beta) estimates

| Effect*                      | Estimate | SE       | DF   | t Value | Pr >  t | 95% CI, lower | 95% CI, upper |
|------------------------------|----------|----------|------|---------|---------|---------------|---------------|
| Intercept                    | -3.8819  | 0.5405   | 14   | -7.18   | <0.0001 | -5.0411       | -2.7228       |
| Phase (1)                    | -0.1701  | 0.03775  | 6089 | -4.51   | <0.0001 | -0.2441       | -0.09612      |
| Emphysema (absent)           | -0.5665  | 0.05032  | 6089 | -11.26  | <0.0001 | -0.6652       | -0.4679       |
| Phase (1)*Emphysema (absent) | 0.3676   | 0.04250  | 6089 | 8.65    | <0.0001 | 0.2843        | 0.4509        |
| Age, years                   | 0.01539  | 0.002472 | 6089 | 6.22    | <0.0001 | 0.01054       | 0.02024       |
| Height, cm                   | 0.01769  | 0.002591 | 6089 | 6.83    | <0.0001 | 0.01261       | 0.02277       |
| Gender (Male)                | 0.6328   | 0.04688  | 6089 | 13.50   | <0.0001 | 0.5409        | 0.7247        |
| Race (White)                 | 0.2817   | 0.04502  | 6089 | 6.26    | <0.0001 | 0.1935        | 0.3700        |
| Smoking status (former)      | 0.4942   | 0.04333  | 6089 | 11.40   | <0.0001 | 0.4092        | 0.5791        |
| Scanner make (GE)**          | -0.6120  | 0.4044   | 6089 | -1.51   | 0.1303  | -1.4049       | 0.1808        |
| Scanner make (Phillips)**    | -1.4892  | 0.5897   | 6089 | -2.53   | 0.0116  | -2.6452       | -0.3333       |
| B35f_flag (no)               | 0.1763   | 0.1198   | 6089 | 1.47    | 0.1412  | -0.05856      | 0.4112        |
| Weight, kg                   | -0.00520 | 0.000981 | 6089 | -5.30   | <0.0001 | -0.00713      | -0.00328      |

\* Predictors followed by a level in parentheses are indicators; the estimate represents the average change in the outcome for that level compared with the reference level. Other predictors are continuous.

\*\* Siemens is reference.

### Type 3 Tests of Fixed Effects

| Effect       | Num DF | Den DF | F Value | Pr > F |
|--------------|--------|--------|---------|--------|
| Scanner make | 2      | 6089   | 3.49    | 0.306  |

### Estimates

| Label                           | Estimate | SE      | DF   | t Value | Pr >  t | 95% CI, lower | 95% CI, upper |
|---------------------------------|----------|---------|------|---------|---------|---------------|---------------|
| Change for 'no emphysema' group | -0.1975  | 0.03474 | 6089 | -5.69   | <0.0001 | -0.2656       | -0.1294       |
| Change for 'emphysema' group    | 0.1701   | 0.03775 | 6089 | 4.51    | <0.0001 | 0.09612       | 0.2441        |

### Least squares means for Phase\*Emphysema categories

| Phase | Emphysema (0 = abs, 1 = present) | Estimate | SE     | DF   | t Value | Pr >  t | 95% CI, lower | 95% CI, upper |
|-------|----------------------------------|----------|--------|------|---------|---------|---------------|---------------|
| 1     | 0                                | -0.6801  | 0.2427 | 6089 | -2.80   | 0.0051  | -1.1560       | -0.2043       |
| 1     | 1                                | -0.4812  | 0.2424 | 6089 | -1.99   | 0.0471  | -0.9563       | -0.00614      |
| 2     | 0                                | -0.8777  | 0.2440 | 6089 | -3.60   | 0.0003  | -1.3559       | -0.3994       |
| 2     | 1                                | -0.3111  | 0.2443 | 6089 | -1.27   | 0.2028  | -0.7899       | 0.1677        |

Outcome: FRC/TLC, r = 5358

### Covariance Parameter Estimates (1 and 2 in parentheses refer to Phases)

| Covariance Parameter |               | Estimate |
|----------------------|---------------|----------|
| Study center         |               | 10.7914  |
| Scanner model        |               | 4.6614   |
| UN (1,1)             | Subject level | 54.5612  |
| UN (2,1)             | Subject level | 21.3306  |
| UN (2,2)             | Subject level | 50.7750  |

### Fixed parameter (Beta) estimates

| Effect*                      | Estimate | SE       | DF   | t Value | Pr >  t | 95% CI, lower | 95% CI, upper |
|------------------------------|----------|----------|------|---------|---------|---------------|---------------|
| Intercept                    | 33.5778  | 3.3019   | 13   | 10.17   | <0.0001 | 26.4444       | 40.7112       |
| Phase (1)                    | 0.5696   | 0.3002   | 5312 | 1.90    | 0.0579  | -0.01896      | 1.1581        |
| Emphysema (absent)           | -1.1848  | 0.3267   | 5312 | -3.63   | 0.0003  | -1.8253       | -0.5443       |
| Phase (1)*Emphysema (absent) | -0.5156  | 0.3496   | 5312 | -1.47   | 0.1403  | -1.2009       | 0.1697        |
| Age, years                   | 0.3020   | 0.01598  | 5312 | 18.91   | <0.0001 | 0.2707        | 0.3334        |
| Height, cm                   | 0.04114  | 0.01717  | 5312 | 2.40    | 0.0166  | 0.007484      | 0.07480       |
| Gender (Male)                | -1.9959  | 0.3074   | 5312 | -6.49   | <0.0001 | -2.5986       | -1.3932       |
| Race (White)                 | -2.2176  | 0.3041   | 5312 | -7.29   | <0.0001 | -2.8137       | -1.6215       |
| Smoking status (former)      | -2.3465  | 0.2833   | 5312 | -8.28   | <0.0001 | -2.9018       | -1.7912       |
| Scanner make (GE)**          | 3.1726   | 1.3890   | 5312 | 2.28    | 0.0224  | 0.4495        | 5.8957        |
| Scanner make (Phillips)**    | 1.1575   | 2.5521   | 5312 | 0.45    | 0.6502  | -3.8456       | 6.1606        |
| B35f_flag (no)               | 0.1977   | 0.9367   | 5312 | 0.21    | 0.8329  | -1.6386       | 2.0340        |
| Weight, kg                   | -0.02514 | 0.006656 | 5312 | -3.78   | 0.0002  | -0.03819      | -0.01209      |

\* Predictors followed by a level in parentheses are indicators; the estimate represents the average change in the outcome for that level compared with the reference level. Other predictors are continuous.

\*\* Siemens is reference.

### Type 3 Tests of Fixed Effects

| Effect       | Num DF | Den DF | F Value | Pr > F |
|--------------|--------|--------|---------|--------|
| Scanner make | 2      | 5312   | 2.62    | 0.0726 |

### Estimates

| Label                           | Estimate | SE     | DF   | t Value | Pr >  t | 95% CI, lower | 95% CI, upper |
|---------------------------------|----------|--------|------|---------|---------|---------------|---------------|
| Change for 'no emphysema' group | -0.05396 | 0.2728 | 5312 | -0.20   | 0.8432  | -0.5888       | 0.4809        |
| Change for 'emphysema' group    | -0.5696  | 0.3002 | 5312 | -1.90   | 0.0579  | -1.1581       | 0.01896       |

### Least squares means for Phase\*Emphysema categories

| Phase | Emphysema (0 = abs, 1 = present) | Estimate | SE     | DF   | t Value | Pr >  t | 95% CI, lower | 95% CI, upper |
|-------|----------------------------------|----------|--------|------|---------|---------|---------------|---------------|
| 1     | 0                                | 53.5057  | 1.1972 | 5312 | 44.69   | <0.0001 | 51.1586       | 55.8527       |
| 1     | 1                                | 55.2061  | 1.1936 | 5312 | 46.25   | <0.0001 | 52.8662       | 57.5460       |
| 2     | 0                                | 53.4517  | 1.2061 | 5312 | 44.32   | <0.0001 | 51.0872       | 55.8162       |
| 2     | 1                                | 54.6365  | 1.2117 | 5312 | 45.09   | <0.0001 | 52.2610       | 57.0120       |

Outcome: FEV1/FVC, r = 6153

### Covariance Parameter Estimates (1 and 2 in parentheses refer to Phases)

| Covariance Parameter |               | Estimate |
|----------------------|---------------|----------|
| Study center         |               | 0.000015 |
| UN (1,1)             | Subject level | 0.002216 |
| UN (2,1)             | Subject level | 0.001538 |
| UN (2,2)             | Subject level | 0.003365 |

### Fixed parameter (Beta) estimates

| Effect                       | Estimate | SE       | DF   | t Value | Pr >  t | 95% CI, lower | 95% CI, upper |
|------------------------------|----------|----------|------|---------|---------|---------------|---------------|
| Intercept                    | 0.9572   | 0.01916  | 20   | 49.96   | <0.0001 | 0.9172        | 0.9972        |
| Phase (1)                    | 0.01652  | 0.001723 | 6123 | 9.59    | <0.0001 | 0.01314       | 0.01990       |
| Emphysema (absent)           | 0.03242  | 0.002400 | 6123 | 13.51   | <0.0001 | 0.02772       | 0.03713       |
| Phase (1)*Emphysema (absent) | -0.00964 | 0.002174 | 6123 | -4.43   | <0.0001 | -0.01390      | -0.00538      |
| Age, years                   | -0.00120 | 0.000104 | 6123 | -11.57  | <0.0001 | -0.00140      | -0.00100      |
| Height, cm                   | -0.00089 | 0.000112 | 6123 | -7.96   | <0.0001 | -0.00111      | -0.00067      |
| Gender (Male)                | -0.00094 | 0.001994 | 6123 | -0.47   | 0.6384  | -0.00485      | 0.002972      |
| Race (White)                 | -0.01860 | 0.001831 | 6123 | -10.16  | <0.0001 | -0.02219      | -0.01501      |
| Smoking status (former)      | 0.006927 | 0.001831 | 6123 | 3.78    | 0.0002  | 0.003337      | 0.01052       |
| Weight, kg                   | 0.000359 | 0.000043 | 6123 | 8.39    | <0.0001 | 0.000275      | 0.000443      |

\* Predictors followed by a level in parentheses are indicators; the estimate represents the average change in the outcome for that level compared with the reference level. Other predictors are continuous.

### Estimates

| Label                           | Estimate | SE       | DF   | t Value | Pr >  t | 95% CI, lower | 95% CI, upper |
|---------------------------------|----------|----------|------|---------|---------|---------------|---------------|
| Change for 'no emphysema' group | -0.00688 | 0.001564 | 6123 | -4.40   | <0.0001 | -0.00994      | -0.00381      |
| Change for 'emphysema' group    | -0.01652 | 0.001723 | 6123 | -9.59   | <0.0001 | -0.01990      | -0.01314      |

### Least squares means for Phase\*Emphysema categories

| Phase | Emphysema (0 = abs, 1 = present) | Estimate | SE       | DF   | t Value | Pr >  t | 95% CI, lower | 95% CI, upper |
|-------|----------------------------------|----------|----------|------|---------|---------|---------------|---------------|
| 1     | 0                                | 0.7984   | 0.001491 | 6123 | 535.54  | <0.0001 | 0.7955        | 0.8013        |
| 1     | 1                                | 0.7756   | 0.001485 | 6123 | 522.48  | <0.0001 | 0.7727        | 0.7785        |
| 2     | 0                                | 0.7915   | 0.001907 | 6123 | 415.05  | <0.0001 | 0.7878        | 0.7953        |
| 2     | 1                                | 0.7591   | 0.002084 | 6123 | 364.20  | <0.0001 | 0.7550        | 0.7632        |

Outcome: FEV1, r = 6153

### Covariance Parameter Estimates (1 and 2 in parentheses refer to Phases)

| Covariance Parameter |               | Estimate |
|----------------------|---------------|----------|
| Study center         |               | 0.001687 |
| UN (1,1)             | Subject level | 0.1103   |
| UN (2,1)             | Subject level | 0.09104  |
| UN (2,2)             | Subject level | 0.1413   |

### Fixed parameter (Beta) estimates

| Effect                       | Estimate | SE       | DF   | t Value | Pr >  t | 95% CI, lower | 95% CI, upper |
|------------------------------|----------|----------|------|---------|---------|---------------|---------------|
| Intercept                    | -1.9591  | 0.1342   | 20   | -14.59  | <0.0001 | -2.2391       | -1.6791       |
| Phase (1)                    | 0.08134  | 0.009568 | 6123 | 8.50    | <0.0001 | 0.06258       | 0.1001        |
| Emphysema (absent)           | 0.1173   | 0.01462  | 6123 | 8.02    | <0.0001 | 0.08862       | 0.1459        |
| Phase (1)*Emphysema (absent) | -0.02662 | 0.01155  | 6123 | -2.30   | 0.0212  | -0.04927      | -0.00398      |
| Age, years                   | -0.02836 | 0.000741 | 6123 | -38.28  | <0.0001 | -0.02981      | -0.02691      |
| Height, cm                   | 0.03621  | 0.000776 | 6123 | 46.65   | <0.0001 | 0.03469       | 0.03774       |
| Gender (Male)                | 0.5063   | 0.01410  | 6123 | 35.90   | <0.0001 | 0.4786        | 0.5339        |
| Race (White)                 | 0.3829   | 0.01327  | 6123 | 28.84   | <0.0001 | 0.3568        | 0.4089        |
| Smoking status (former)      | 0.05096  | 0.01306  | 6123 | 3.90    | <0.0001 | 0.02535       | 0.07656       |
| Weight, kg                   | -0.00427 | 0.000291 | 6123 | -14.66  | <0.0001 | -0.00484      | -0.00370      |

\* Predictors followed by a level in parentheses are indicators; the estimate represents the average change in the outcome for that level compared with the reference level. Other predictors are continuous.

### Estimates

| Label                           | Estimate | SE       | DF   | t Value | Pr >  t | 95% CI, lower | 95% CI, upper |
|---------------------------------|----------|----------|------|---------|---------|---------------|---------------|
| Change for 'no emphysema' group | -0.05471 | 0.008735 | 6123 | -6.26   | <0.0001 | -0.07184      | -0.03759      |
| Change for 'emphysema' group    | -0.08134 | 0.009568 | 6123 | -8.50   | <0.0001 | -0.1001       | -0.06258      |

### Least squares means for Phase\*Emphysema categories

| Phase | Emphysema (0 = abs, 1 = present) | Estimate | SE      | DF   | t Value | Pr >  t | 95% CI, lower | 95% CI, upper |
|-------|----------------------------------|----------|---------|------|---------|---------|---------------|---------------|
| 1     | 0                                | 2.8072   | 0.01285 | 6123 | 218.38  | <0.0001 | 2.7820        | 2.8324        |
| 1     | 1                                | 2.7166   | 0.01280 | 6123 | 212.31  | <0.0001 | 2.6915        | 2.7417        |
| 2     | 0                                | 2.7525   | 0.01427 | 6123 | 192.85  | <0.0001 | 2.7245        | 2.7805        |
| 2     | 1                                | 2.6352   | 0.01514 | 6123 | 174.10  | <0.0001 | 2.6056        | 2.6649        |

Outcome: 6MWD

### Covariance Parameter Estimates (1 and 2 in parentheses refer to Phases)

| Covariance Parameter |               | Estimate |
|----------------------|---------------|----------|
| Study center         |               | 32661    |
| UN (1,1)             | Subject level | 79531    |
| UN (2,1)             | Subject level | 42719    |
| UN (2,2)             | Subject level | 125699   |

### Fixed parameter (Beta) estimates

| Effect*            | Estimate | SE      | DF   | t Value | Pr >  t | 95% CI, lower | 95% CI, upper |
|--------------------|----------|---------|------|---------|---------|---------------|---------------|
| Intercept          | 1036.41  | 121.03  | 20   | 8.56    | <0.0001 | 783.94        | 1288.88       |
| Phase (1)          | 46.4154  | 11.5625 | 6103 | 4.01    | <0.0001 | 23.7488       | 69.0820       |
| Emphysema (absent) | 28.9218  | 15.2329 | 6103 | 1.90    | 0.0577  | -0.9400       | 58.7837       |

|                              |          |         |      |        |         |          |         |
|------------------------------|----------|---------|------|--------|---------|----------|---------|
| Phase (1)*Emphysema (absent) | 9.1214   | 14.8088 | 6103 | 0.62   | 0.5380  | -19.9092 | 38.1519 |
| Age, years                   | -10.1430 | 0.6208  | 6103 | -16.34 | <0.0001 | -11.3601 | -8.9260 |
| Height, cm                   | 6.9116   | 0.6654  | 6103 | 10.39  | <0.0001 | 5.6072   | 8.2159  |
| Gender (Male)                | 74.4858  | 11.8529 | 6103 | 6.28   | <0.0001 | 51.2499  | 97.7216 |
| Race (White)                 | 85.8118  | 11.3445 | 6103 | 7.56   | <0.0001 | 63.5725  | 108.05  |
| Smoking status (former)      | 117.47   | 10.8652 | 6103 | 10.81  | <0.0001 | 96.1682  | 138.77  |
| Weight, kg                   | -4.6776  | 0.2572  | 6103 | -18.18 | <0.0001 | -5.1818  | -4.1733 |

\* Predictors followed by a level in parentheses are indicators; the estimate represents the average change in the outcome for that level compared with the reference level. Other predictors are continuous.

## Estimates

| Label                           | Estimate | SE      | DF   | t Value | Pr >  t | 95% CI, lower | 95% CI, upper |
|---------------------------------|----------|---------|------|---------|---------|---------------|---------------|
| Change for 'no emphysema' group | -55.5368 | 10.5271 | 6103 | -5.28   | <0.0001 | -76.1736      | -34.9000      |
| Change for 'emphysema' group    | -46.4154 | 11.5625 | 6103 | -4.01   | <0.0001 | -69.0820      | -23.7488      |

## Least squares means for Phase\*Emphysema categories

| Phase | Emphysema (0 = abs, 1 = present) | Estimate | SE      | DF   | t Value | Pr >  t | 95% CI, lower | 95% CI, upper |
|-------|----------------------------------|----------|---------|------|---------|---------|---------------|---------------|
| 1     | 0                                | 1443.63  | 40.5821 | 6103 | 35.57   | <0.0001 | 1364.07       | 1523.18       |
| 1     | 1                                | 1405.58  | 40.5376 | 6103 | 34.67   | <0.0001 | 1326.11       | 1485.05       |
| 2     | 0                                | 1388.09  | 41.3522 | 6103 | 33.57   | <0.0001 | 1307.02       | 1469.15       |
| 2     | 1                                | 1359.17  | 41.6511 | 6103 | 32.63   | <0.0001 | 1277.52       | 1440.82       |

Outcome: Total SGRQ; r = 6179

## Covariance Parameter Estimates (1 and 2 in parentheses refer to Phases)

| Covariance Parameter |               | Estimate |
|----------------------|---------------|----------|
| Study center         |               | 22.8574  |
| UN (1,1)             | Subject level | 259.48   |
| UN (2,1)             | Subject level | 150.39   |
| UN (2,2)             | Subject level | 256.23   |

## Fixed parameter (Beta) estimates

| Effect*                      | Estimate | SE      | DF   | t Value | Pr >  t | 95% CI, lower | 95% CI, upper |
|------------------------------|----------|---------|------|---------|---------|---------------|---------------|
| Intercept                    | 53.8475  | 6.3532  | 20   | 8.48    | <0.0001 | 40.5949       | 67.1001       |
| Phase (1)                    | -0.2158  | 0.4940  | 6149 | -0.44   | 0.6623  | -1.1841       | 0.7526        |
| Emphysema (absent)           | -3.5586  | 0.6603  | 6149 | -5.39   | <0.0001 | -4.8530       | -2.2642       |
| Phase (1)*Emphysema (absent) | 0.5969   | 0.6111  | 6149 | 0.98    | 0.3287  | -0.6010       | 1.7948        |
| Age, years                   | -0.01361 | 0.03439 | 6149 | -0.40   | 0.6923  | -0.08104      | 0.05381       |
| Height, cm                   | -0.2842  | 0.03633 | 6149 | -7.82   | <0.0001 | -0.3554       | -0.2130       |
| Gender (Male)                | -3.4263  | 0.6543  | 6149 | -5.24   | <0.0001 | -4.7089       | -2.1437       |
| Race (White)                 | -0.2412  | 0.6295  | 6149 | -0.38   | 0.7017  | -1.4752       | 0.9929        |
| Smoking status (former)      | -6.5305  | 0.6049  | 6149 | -10.80  | <0.0001 | -7.7163       | -5.3446       |
| Weight, kg                   | 0.2370   | 0.01383 | 6149 | 17.14   | <0.0001 | 0.2099        | 0.2641        |

\* Predictors followed by a level in parentheses are indicators; the estimate represents the average change in the outcome for that level compared with the reference level. Other predictors are continuous.

## Estimates

| Label                           | Estimate | SE     | DF   | t Value | Pr >  t | 95% CI, lower | 95% CI, upper |
|---------------------------------|----------|--------|------|---------|---------|---------------|---------------|
| Change for 'no emphysema' group | -0.3811  | 0.4544 | 6149 | -0.84   | 0.4017  | -1.2720       | 0.5097        |
| Change for 'emphysema' group    | 0.2158   | 0.4940 | 6149 | 0.44    | 0.6623  | -0.7526       | 1.1841        |

## Least squares means for Phase\*Emphysema categories

| Phase | Emphysema (0 = abs, 1 = present) | Estimate | SE     | DF   | t Value | Pr >  t | 95% CI, lower | 95% CI, upper |
|-------|----------------------------------|----------|--------|------|---------|---------|---------------|---------------|
| 1     | 0                                | 16.3441  | 1.1590 | 6149 | 14.10   | <0.0001 | 14.0721       | 18.6162       |
| 1     | 1                                | 19.3058  | 1.1558 | 6149 | 16.70   | <0.0001 | 17.0400       | 21.5716       |
| 2     | 0                                | 15.9630  | 1.1858 | 6149 | 13.46   | <0.0001 | 13.6383       | 18.2877       |
| 2     | 1                                | 19.5216  | 1.2063 | 6149 | 16.18   | <0.0001 | 17.1568       | 21.8864       |

Outcome: SF36gen; r = 4000

## Covariance Parameter Estimates (1 and 2 in parentheses refer to Phases)

| Covariance Parameter |               | Estimate |
|----------------------|---------------|----------|
| Study center         |               | 1.8546   |
| UN (1,1)             | Subject level | 90.2797  |
| UN (2,1)             | Subject level | 52.8495  |
| UN (2,2)             | Subject level | 81.8619  |

## Fixed parameter (Beta) estimates

| Effect*                      | Estimate | SE       | DF   | t Value | Pr >  t | 95% CI, lower | 95% CI, upper |
|------------------------------|----------|----------|------|---------|---------|---------------|---------------|
| Intercept                    | 31.0936  | 4.3962   | 20   | 7.07    | <0.0001 | 21.9233       | 40.2638       |
| Phase (1)                    | 0.8652   | 0.3431   | 3970 | 2.52    | 0.0117  | 0.1926        | 1.5378        |
| Emphysema (absent)           | 1.8679   | 0.3922   | 3970 | 4.76    | <0.0001 | 1.0989        | 2.6368        |
| Phase (1)*Emphysema (absent) | -0.1087  | 0.4384   | 3970 | -0.25   | 0.8041  | -0.9681       | 0.7507        |
| Age, years                   | 0.05938  | 0.02362  | 3970 | 2.51    | 0.0120  | 0.01308       | 0.1057        |
| Height, cm                   | 0.1129   | 0.02541  | 3970 | 4.44    | <0.0001 | 0.06306       | 0.1627        |
| Gender (Male)                | 0.08796  | 0.4532   | 3970 | 0.19    | 0.8461  | -0.8007       | 0.9766        |
| Race (White)                 | 0.1055   | 0.4305   | 3970 | 0.25    | 0.8063  | -0.7385       | 0.9496        |
| Smoking status (former)      | 3.9795   | 0.4159   | 3970 | 9.57    | <0.0001 | 3.1640        | 4.7950        |
| Weight, kg                   | -0.1037  | 0.009529 | 3970 | -10.88  | <0.0001 | -0.1224       | -0.08500      |

\* Predictors followed by a level in parentheses are indicators; the estimate represents the average change in the outcome for that level compared with the reference level. Other predictors are continuous.

## Estimates

| Label                           | Estimate | SE     | DF   | t Value | Pr >  t | 95% CI, lower | 95% CI, upper |
|---------------------------------|----------|--------|------|---------|---------|---------------|---------------|
| Change for 'no emphysema' group | -0.7565  | 0.3337 | 3970 | -2.27   | 0.0235  | -1.4108       | -0.1022       |
| Change for 'emphysema' group    | -0.8652  | 0.3431 | 3970 | -2.52   | 0.0117  | -1.5378       | -0.1926       |

## Least squares means for Phase\*Emphysema categories

| Phase | Emphysema (0 = abs, 1 = present) | Estimate | SE     | DF   | t Value | Pr >  t | 95% CI, lower | 95% CI, upper |
|-------|----------------------------------|----------|--------|------|---------|---------|---------------|---------------|
| 1     | 0                                | 49.8257  | 0.4592 | 3970 | 108.52  | <0.0001 | 48.9255       | 50.7258       |
| 1     | 1                                | 48.0665  | 0.4514 | 3970 | 106.48  | <0.0001 | 47.1815       | 48.9515       |
| 2     | 0                                | 49.0692  | 0.4281 | 3970 | 114.62  | <0.0001 | 48.2299       | 49.9085       |
| 2     | 1                                | 47.2013  | 0.4466 | 3970 | 105.70  | <0.0001 | 46.3258       | 48.0768       |



## Appendix E2

Extended output for Table 4. All models were fit using the REML estimation approach.

Outcome: Adjusted lung density;  $n = 2886$  records used for analysis

### Covariance Parameter Estimates

| Covariance Parameter | Estimate |
|----------------------|----------|
| Subject              | 176.73   |
| Study center         | 7.0644   |
| Scanner model        | 59.6583  |
| Residual             | 42.1972  |

### Type 3 Tests of Fixed Effects

| Effect                | Num DF | Den DF | F Value | Pr > F  |
|-----------------------|--------|--------|---------|---------|
| Emphysema class       | 3      | 880    | 17.30   | <0.0001 |
| Phase*Emphysema class | 3      | 880    | 4.21    | 0.0057  |
| Scanner make          | 2      | 880    | 1.82    | 0.1633  |

### Fixed parameter (Beta) estimates

| Effect*                          | Estimate | SE      | DF  | t Value | Pr >  t | 95% CI, lower | 95% CI, upper |
|----------------------------------|----------|---------|-----|---------|---------|---------------|---------------|
| Intercept                        | 183.68   | 9.6260  | 5   | 19.08   | <0.0001 | 158.94        | 208.43        |
| Phase (1)                        | 5.6287   | 2.2719  | 880 | 2.48    | 0.0134  | 1.1698        | 10.0876       |
| Emphysema (Mild)**               | 16.1751  | 3.1976  | 880 | 5.06    | <0.0001 | 9.8993        | 22.4510       |
| Emphysema (Mod.)**               | 13.4563  | 3.2054  | 880 | 4.20    | <0.0001 | 7.1652        | 19.7474       |
| Emphysema (Adv./Conf.)**         | 9.4081   | 3.3251  | 880 | 2.83    | 0.0048  | 2.8821        | 15.9341       |
| Phase (1)*Emphysema (Mild)       | -3.6158  | 2.2946  | 880 | -1.58   | 0.1154  | -8.1192       | 0.8877        |
| Phase (1)*Emphysema (Mod)        | -1.5010  | 2.3033  | 880 | -0.65   | 0.5148  | -6.0217       | 3.0196        |
| Phase (1)*Emphysema (Adv./Conf.) | -1.8429  | 2.3968  | 880 | -0.77   | 0.4421  | -6.5470       | 2.8612        |
| Age, years                       | 0.002434 | 0.04807 | 880 | 0.05    | 0.9596  | -0.09192      | 0.09678       |
| Height, cm                       | -0.7579  | 0.04938 | 880 | -15.35  | <0.0001 | -0.8548       | -0.6610       |
| Gender (Male)                    | -8.8997  | 0.8870  | 880 | -10.03  | <0.0001 | -10.6405      | -7.1588       |
| Race (White)                     | -5.7251  | 0.8301  | 880 | -6.90   | <0.0001 | -7.3543       | -4.0958       |
| Smoking status (former)          | -14.6648 | 0.8700  | 880 | -16.86  | <0.0001 | -16.3723      | -12.9574      |
| Scanner_make (GE)***             | 6.2697   | 4.3954  | 880 | 1.43    | 0.1541  | -2.3570       | 14.8965       |
| Scanner_make (Phillips)***       | 10.3718  | 6.3098  | 880 | 1.64    | 0.1006  | -2.0122       | 22.7559       |
| B35f_flag (no)                   | 0.9853   | 1.8668  | 880 | 0.53    | 0.5978  | -2.6785       | 4.6492        |
| Weight_KG                        | 0.4119   | 0.01940 | 880 | 21.23   | <0.0001 | 0.3738        | 0.4499        |

\* Predictors followed by a level in parentheses are indicators; the estimate represents the average change in the outcome for that level compared with the reference level. Other predictors are continuous.

\*\* Trace level is reference.

\*\*\* Siemens is reference.

## Estimates

| Label                 | Estimate | SE     | DF  | t Value | Pr >  t | 95% CI, Lower | 95% CI, Upper |
|-----------------------|----------|--------|-----|---------|---------|---------------|---------------|
| Change for Trace      | -2.0129  | 0.5610 | 880 | -3.59   | 0.0004  | -3.1140       | -0.9118       |
| Change for Mild       | -4.1277  | 0.5859 | 880 | -7.05   | <0.0001 | -5.2775       | -2.9778       |
| Change for Moderate   | -3.7858  | 0.8831 | 880 | -4.29   | <0.0001 | -5.5189       | -2.0526       |
| Change for Conf./adv. | -5.6287  | 2.2719 | 880 | -2.48   | 0.0134  | -10.0876      | -1.1698       |

## Least squares means

| Phase | Emphysema presence category | Estimate | SE     | DF  | t Value | Pr >  t | 95% CI, Lower | 95% CI, Upper |
|-------|-----------------------------|----------|--------|-----|---------|---------|---------------|---------------|
| 1     | Trace                       | 97.8093  | 2.6406 | 880 | 37.04   | <0.0001 | 92.6266       | 102.99        |
| 1     | Mild                        | 97.2052  | 2.6512 | 880 | 36.66   | <0.0001 | 92.0017       | 102.41        |
| 1     | Moderate                    | 92.8151  | 2.7496 | 880 | 33.76   | <0.0001 | 87.4185       | 98.2116       |
| 1     | Advanced/Confluent          | 85.2499  | 3.8045 | 880 | 22.41   | <0.0001 | 77.7830       | 92.7169       |
| 2     | Trace                       | 95.7964  | 2.6725 | 880 | 35.84   | <0.0001 | 90.5511       | 101.04        |
| 2     | Mild                        | 93.0776  | 2.6890 | 880 | 34.61   | <0.0001 | 87.8000       | 98.3551       |
| 2     | Moderate                    | 89.0293  | 2.8275 | 880 | 31.49   | <0.0001 | 83.4798       | 94.5788       |
| 2     | Advanced/Confluent          | 79.6212  | 4.0816 | 880 | 19.51   | <0.0001 | 71.6105       | 87.6320       |

Outcome: Perc15, r = 2886

## Covariance Parameter Estimates

| Covariance Parameter | Estimate |
|----------------------|----------|
| Subject              | 245.56   |
| Study center         | 19.5599  |
| Scanner model        | 48.5779  |
| Residual             | 113.75   |

## Type 3 Tests of Fixed Effects

| Effect                | Num DF | Den DF | F Value | Pr > F  |
|-----------------------|--------|--------|---------|---------|
| Emphysema class       | 3      | 880    | 13.93   | <0.0001 |
| Phase*Emphysema class | 3      | 880    | 0.79    | 0.4993  |
| Scanner make          | 2      | 880    | 1.32    | 0.2686  |

## Fixed parameter (Beta) estimates

| Effect*                          | Estimate | SE      | DF  | t Value | Pr >  t | 95% CI, Lower | 95% CI, Upper |
|----------------------------------|----------|---------|-----|---------|---------|---------------|---------------|
| Intercept                        | 141.96   | 12.2729 | 5   | 11.57   | <0.0001 | 110.41        | 173.51        |
| Phase (1)                        | 5.7731   | 3.6644  | 880 | 1.58    | 0.1155  | -1.4188       | 12.9651       |
| Emphysema (Mild)**               | 16.1336  | 4.3296  | 880 | 3.73    | 0.0002  | 7.6360        | 24.6311       |
| Emphysema (Mod.)**               | 12.6718  | 4.3410  | 880 | 2.92    | 0.0036  | 4.1518        | 21.1918       |
| Emphysema (Adv./Conf.)**         | 8.9394   | 4.5064  | 880 | 1.98    | 0.0476  | 0.09491       | 17.7839       |
| Phase (1)*Emphysema (Mild)       | -3.0906  | 3.7111  | 880 | -0.83   | 0.4052  | -10.3743      | 4.1931        |
| Phase (1)*Emphysema (Mod)        | -1.7191  | 3.7251  | 880 | -0.46   | 0.6446  | -9.0302       | 5.5920        |
| Phase (1)*Emphysema (Adv./Conf.) | -3.0610  | 3.8749  | 880 | -0.79   | 0.4298  | -10.6662      | 4.5442        |
| Age, years                       | -0.09661 | 0.06100 | 880 | -1.58   | 0.1136  | -0.2163       | 0.02310       |
| Height, cm                       | -0.4976  | 0.06398 | 880 | -7.78   | <0.0001 | -0.6232       | -0.3720       |
| Gender (Male)                    | -11.8967 | 1.1274  | 880 | -10.55  | <0.0001 | -14.1094      | -9.6840       |
| Race (White)                     | -7.9322  | 1.0570  | 880 | -7.50   | <0.0001 | -10.0067      | -5.8576       |
| Smoking status (former)          | -12.7055 | 1.0987  | 880 | -11.56  | <0.0001 | -14.8618      | -10.5491      |
| Scanner_make (GE)***             | 5.8780   | 4.2239  | 880 | 1.39    | 0.1644  | -2.4121       | 14.1680       |

|                            |        |         |     |       |         |         |         |
|----------------------------|--------|---------|-----|-------|---------|---------|---------|
| Scanner_make (Phillips)*** | 7.9376 | 6.5817  | 880 | 1.21  | 0.2281  | -4.9800 | 20.8552 |
| B35f_flag (no)             | 2.3719 | 2.6592  | 880 | 0.89  | 0.3726  | -2.8472 | 7.5910  |
| Weight_KG                  | 0.4662 | 0.02591 | 880 | 18.00 | <0.0001 | 0.4154  | 0.5171  |

\* Predictors followed by a level in parentheses are indicators; the estimate represents the average change in the outcome for that level compared with the reference level. Other predictors are continuous.

\*\* Trace level is reference.

\*\*\* Siemens is reference.

## Estimates

| Label                 | Estimate | SE     | DF  | t Value | Pr >  t | 95% CI, Lower | 95% CI, Upper |
|-----------------------|----------|--------|-----|---------|---------|---------------|---------------|
| Change for Trace      | -2.6825  | 0.8594 | 880 | -3.12   | 0.0019  | -4.3692       | -0.9959       |
| Change for Mild       | -4.0540  | 0.9016 | 880 | -4.50   | <0.0001 | -5.8236       | -2.2844       |
| Change for Moderate   | -2.7121  | 1.3958 | 880 | -1.94   | 0.0523  | -5.4516       | 0.02737       |
| Change for Conf./adv. | -5.7731  | 3.6644 | 880 | -1.58   | 0.1155  | -12.9651      | 1.4188        |

## Least squares means

| Phase | Emphysema presence category | Estimate | SE     | DF  | t Value | Pr >  t | 95% CI, Lower | 95% CI, Upper |
|-------|-----------------------------|----------|--------|-----|---------|---------|---------------|---------------|
| 1     | Trace                       | 97.5784  | 2.9453 | 880 | 33.13   | <0.0001 | 91.7977       | 103.36        |
| 1     | Mild                        | 95.4881  | 2.9608 | 880 | 32.25   | <0.0001 | 89.6771       | 101.30        |
| 1     | Moderate                    | 90.4138  | 3.1004 | 880 | 29.16   | <0.0001 | 84.3289       | 96.4987       |
| 1     | Advanced/Confluent          | 84.5354  | 4.5851 | 880 | 18.44   | <0.0001 | 75.5363       | 93.5345       |
| 2     | Trace                       | 94.8959  | 3.0080 | 880 | 31.55   | <0.0001 | 88.9922       | 100.80        |
| 2     | Mild                        | 91.4341  | 3.0360 | 880 | 30.12   | <0.0001 | 85.4754       | 97.3929       |
| 2     | Moderate                    | 87.7017  | 3.2605 | 880 | 26.90   | <0.0001 | 81.3023       | 94.1010       |
| 2     | Advanced/Confluent          | 78.7623  | 5.1441 | 880 | 15.31   | <0.0001 | 68.6663       | 88.8583       |

Outcome: ln(LAA950), r = 2886

## Covariance Parameter Estimates

| Covariance Parameter | Estimate |
|----------------------|----------|
| Subject              | 0.7957   |
| Study center         | 0.1253   |
| Scanner model        | 0.4015   |
| Residual             | 0.3452   |

## Type 3 Tests of Fixed Effects

| Effect                | Num DF | Den DF | F Value | Pr > F  |
|-----------------------|--------|--------|---------|---------|
| Emphysema class       | 3      | 880    | 112.29  | <0.0001 |
| Phase*Emphysema class | 3      | 880    | 9.63    | <0.0001 |
| Scanner make          | 2      | 880    | 3.19    | 0.0414  |

## Fixed parameter (Beta) estimates

| Effect*                  | Estimate | SE     | DF  | t Value | Pr >  t | 95% CI, Lower | 95% CI, Upper |
|--------------------------|----------|--------|-----|---------|---------|---------------|---------------|
| Intercept                | -2.3374  | 0.7181 | 5   | -3.25   | 0.0226  | -4.1835       | -0.4914       |
| Phase (1)                | -0.3726  | 0.2023 | 880 | -1.84   | 0.0659  | -0.7697       | 0.02456       |
| Emphysema (Mild)**       | -2.0096  | 0.2428 | 880 | -8.28   | <0.0001 | -2.4862       | -1.5330       |
| Emphysema (Mod.)**       | -1.4319  | 0.2435 | 880 | -5.88   | <0.0001 | -1.9097       | -0.9540       |
| Emphysema (Adv./Conf.)** | -0.5659  | 0.2527 | 880 | -2.24   | 0.0254  | -1.0619       | -0.06990      |

|                                  |          |          |     |       |         |          |          |
|----------------------------------|----------|----------|-----|-------|---------|----------|----------|
| Phase (1)*Emphysema (Mild)       | 0.3640   | 0.2048   | 880 | 1.78  | 0.0759  | -0.03799 | 0.7660   |
| Phase (1)*Emphysema (Mod)        | 0.1080   | 0.2056   | 880 | 0.53  | 0.5995  | -0.2955  | 0.5115   |
| Phase (1)*Emphysema (Adv./Conf.) | 0.02277  | 0.2139   | 880 | 0.11  | 0.9153  | -0.3971  | 0.4426   |
| Age, years                       | 0.01381  | 0.003456 | 880 | 4.00  | <0.0001 | 0.007025 | 0.02059  |
| Height, cm                       | 0.02209  | 0.003609 | 880 | 6.12  | <0.0001 | 0.01501  | 0.02918  |
| Gender (Male)                    | 0.6326   | 0.06366  | 880 | 9.94  | <0.0001 | 0.5076   | 0.7575   |
| Race (White)                     | 0.2031   | 0.06022  | 880 | 3.37  | 0.0008  | 0.08490  | 0.3213   |
| Smoking status (former)          | 0.6036   | 0.06211  | 880 | 9.72  | <0.0001 | 0.4817   | 0.7255   |
| Scanner_make (GE)***             | -0.4788  | 0.3628   | 880 | -1.32 | 0.1873  | -1.1910  | 0.2333   |
| Scanner_make (Phillips)***       | -1.2866  | 0.5230   | 880 | -2.46 | 0.0141  | -2.3131  | -0.2601  |
| B35f_flag (no)                   | -0.07338 | 0.1493   | 880 | -0.49 | 0.6233  | -0.3665  | 0.2197   |
| Weight_KG                        | -0.01111 | 0.001458 | 880 | -7.62 | <0.0001 | -0.01397 | -0.00825 |

\* Predictors followed by a level in parentheses are indicators; the estimate represents the average change in the outcome for that level compared with the reference level. Other predictors are continuous.

\*\* Trace level is reference.

\*\*\* Siemens is reference.

## Estimates

| Label                 | Estimate | SE      | DF  | t Value | Pr >  t | 95% CI Lower | 95% CI, Upper |
|-----------------------|----------|---------|-----|---------|---------|--------------|---------------|
| Change for Trace      | 0.008557 | 0.04798 | 880 | 0.18    | 0.8585  | -0.08561     | 0.1027        |
| Change for Mild       | 0.2646   | 0.05021 | 880 | 5.27    | <0.0001 | 0.1660       | 0.3631        |
| Change for Moderate   | 0.3498   | 0.07743 | 880 | 4.52    | <0.0001 | 0.1978       | 0.5018        |
| Change for Conf./adv. | 0.3726   | 0.2023  | 880 | 1.84    | 0.0659  | -0.02456     | 0.7697        |

## Least squares means

| Phase | Emphysema presence category | Estimate | SE     | DF  | t Value | Pr >  t | 95% CI, Lower | 95% CI, Upper |
|-------|-----------------------------|----------|--------|-----|---------|---------|---------------|---------------|
| 1     | Trace                       | -0.5812  | 0.2246 | 880 | -2.59   | 0.0098  | -1.0220       | -0.1405       |
| 1     | Mild                        | -0.2595  | 0.2253 | 880 | -1.15   | 0.2496  | -0.7016       | 0.1826        |
| 1     | Moderate                    | 0.5212   | 0.2313 | 880 | 2.25    | 0.0245  | 0.06731       | 0.9752        |
| 1     | Advanced/Confluent          | 1.0643   | 0.2994 | 880 | 3.55    | 0.0004  | 0.4767        | 1.6520        |
| 2     | Trace                       | -0.5727  | 0.2272 | 880 | -2.52   | 0.0119  | -1.0187       | -0.1267       |
| 2     | Mild                        | 0.005069 | 0.2282 | 880 | 0.02    | 0.9823  | -0.4428       | 0.4529        |
| 2     | Moderate                    | 0.8710   | 0.2379 | 880 | 3.66    | 0.0003  | 0.4040        | 1.3381        |
| 2     | Advanced/Confluent          | 1.4369   | 0.3261 | 880 | 4.41    | <0.0001 | 0.7970        | 2.0769        |

Outcome: FRC/TLC, r = 2455

## Covariance Parameter Estimates

| Covariance Parameter | Estimate |
|----------------------|----------|
| Subject              | 20.3699  |
| Study center         | 11.2251  |
| Scanner model        | 3.9809   |
| Residual             | 32.0163  |

### Type 3 Tests of Fixed Effects

| Effect                | Num DF | Den DF | F Value | Pr > F |
|-----------------------|--------|--------|---------|--------|
| Emphysema class       | 3      | 675    | 3.70    | 0.0116 |
| Phase*Emphysema class | 3      | 675    | 2.06    | 0.1040 |
| Scanner make          | 2      | 675    | 1.48    | 0.2273 |

### Fixed parameter (Beta) estimates

| Effect*                          | Estimate | SE      | DF  | t Value | Pr >  t | 95% CI, Lower | 95% CI, Upper |
|----------------------------------|----------|---------|-----|---------|---------|---------------|---------------|
| Intercept                        | 34.4228  | 4.9600  | 4   | 6.94    | 0.0023  | 20.6517       | 48.1939       |
| Phase (1)                        | 4.1214   | 1.9936  | 675 | 2.07    | 0.0391  | 0.2070        | 8.0358        |
| Emphysema (Mild)**               | 5.0932   | 1.8611  | 675 | 2.74    | 0.0064  | 1.4390        | 8.7474        |
| Emphysema (Mod.)**               | 6.0956   | 1.8667  | 675 | 3.27    | 0.0011  | 2.4303        | 9.7609        |
| Emphysema (Adv./Conf.)**         | 4.7279   | 1.9425  | 675 | 2.43    | 0.0152  | 0.9137        | 8.5420        |
| Phase (1)*Emphysema (Mild)       | -3.6264  | 2.0221  | 675 | -1.79   | 0.0734  | -7.5967       | 0.3439        |
| Phase (1)*Emphysema (Mod)        | -4.2503  | 2.0307  | 675 | -2.09   | 0.0367  | -8.2376       | -0.2630       |
| Phase (1)*Emphysema (Adv./Conf.) | -2.9773  | 2.1163  | 675 | -1.41   | 0.1599  | -7.1326       | 1.1780        |
| Age, years                       | 0.2630   | 0.02397 | 675 | 10.97   | <0.0001 | 0.2159        | 0.3101        |
| Height, cm                       | 0.02505  | 0.02551 | 675 | 0.98    | 0.3265  | -0.02504      | 0.07514       |
| Gender (Male)                    | -1.3815  | 0.4443  | 675 | -3.11   | 0.0020  | -2.2539       | -0.5091       |
| Race (White)                     | -2.2787  | 0.4281  | 675 | -5.32   | <0.0001 | -3.1193       | -1.4381       |
| Smoking status (former)          | -2.6898  | 0.4299  | 675 | -6.26   | <0.0001 | -3.5339       | -1.8458       |
| Scanner_make (GE)***             | 2.5019   | 1.4519  | 675 | 1.72    | 0.0853  | -0.3489       | 5.3528        |
| Scanner_make (Phillips)***       | 1.2323   | 2.6304  | 675 | 0.47    | 0.6396  | -3.9324       | 6.3969        |
| B35f_flag (no)                   | 0.2143   | 1.1802  | 675 | 0.18    | 0.8559  | -2.1029       | 2.5316        |
| Weight_KG                        | -0.03396 | 0.01064 | 675 | -3.19   | 0.0015  | -0.05486      | -0.01306      |

\* Predictors followed by a level in parentheses are indicators; the estimate represents the average change in the outcome for that level compared with the reference level. Other predictors are continuous.

\*\* Trace level is reference.

\*\*\* Siemens is reference.

### Estimates

| Label                 | Estimate | SE     | DF  | t Value | Pr >  t | 95% CI, Lower | 95% CI, Upper |
|-----------------------|----------|--------|-----|---------|---------|---------------|---------------|
| Change for Trace      | -0.4950  | 0.4438 | 675 | -1.12   | 0.2651  | -1.3664       | 0.3763        |
| Change for Mild       | 0.1289   | 0.4716 | 675 | 0.27    | 0.7847  | -0.7971       | 1.0550        |
| Change for Moderate   | -1.1441  | 0.7571 | 675 | -1.51   | 0.1312  | -2.6306       | 0.3424        |
| Change for Conf./adv. | -4.1214  | 1.9936 | 675 | -2.07   | 0.0391  | -8.0358       | -0.2070       |

### Least squares means

| Phase | Emphysema presence category | Estimate | SE     | DF  | t Value | Pr >  t | 95% CI, Lower | 95% CI, Upper |
|-------|-----------------------------|----------|--------|-----|---------|---------|---------------|---------------|
| 1     | Trace                       | 55.4225  | 1.2597 | 675 | 44.00   | <0.0001 | 52.9491       | 57.8959       |
| 1     | Mild                        | 55.8009  | 1.2654 | 675 | 44.10   | <0.0001 | 53.3163       | 58.2855       |
| 1     | Moderate                    | 55.7062  | 1.3230 | 675 | 42.11   | <0.0001 | 53.1086       | 58.3039       |
| 1     | Advanced/Confluent          | 53.9557  | 1.9113 | 675 | 28.23   | <0.0001 | 50.2028       | 57.7085       |
| 2     | Trace                       | 54.9275  | 1.2939 | 675 | 42.45   | <0.0001 | 52.3870       | 57.4679       |
| 2     | Mild                        | 55.9298  | 1.3062 | 675 | 42.82   | <0.0001 | 53.3651       | 58.4946       |
| 2     | Moderate                    | 54.5621  | 1.4105 | 675 | 38.68   | <0.0001 | 51.7926       | 57.3316       |
| 2     | Advanced/Confluent          | 49.8343  | 2.2092 | 675 | 22.56   | <0.0001 | 45.4965       | 54.1720       |

Outcome: FEV1/FVC, r = 2893

### Covariance Parameter Estimates

| Covariance Parameter | Estimate |
|----------------------|----------|
| Subject              | 0.001166 |
| Study center         | 3.193E-6 |
| Residual             | 0.001272 |

### Type 3 Tests of Fixed Effects

| Effect                | Num DF | Den DF | F Value | Pr > F  |
|-----------------------|--------|--------|---------|---------|
| Emphysema class       | 3      | 902    | 46.10   | <0.0001 |
| Phase*Emphysema class | 3      | 902    | 4.39    | 0.0045  |

### Fixed parameter (Beta) estimates

| Effect*                          | Estimate | SE       | DF  | t Value | Pr >  t | 95% CI, Lower | 95% CI, Upper |
|----------------------------------|----------|----------|-----|---------|---------|---------------|---------------|
| Intercept                        | 0.9057   | 0.02960  | 5   | 30.60   | <0.0001 | 0.8296        | 0.9818        |
| Phase (1)                        | 0.01148  | 0.01158  | 902 | 0.99    | 0.3218  | -0.01125      | 0.03420       |
| Emphysema (Mild)**               | 0.03220  | 0.01166  | 902 | 2.76    | 0.0059  | 0.009306      | 0.05509       |
| Emphysema (Mod.)**               | 0.01343  | 0.01170  | 902 | 1.15    | 0.2516  | -0.00954      | 0.03640       |
| Emphysema (Adv./Conf.)**         | -0.01426 | 0.01218  | 902 | -1.17   | 0.2422  | -0.03817      | 0.009653      |
| Phase (1)*Emphysema (Mild)       | 0.003281 | 0.01178  | 902 | 0.28    | 0.7806  | -0.01983      | 0.02640       |
| Phase (1)*Emphysema (Mod)        | 0.007500 | 0.01182  | 902 | 0.63    | 0.5260  | -0.01570      | 0.03070       |
| Phase (1)*Emphysema (Adv./Conf.) | 0.02049  | 0.01231  | 902 | 1.66    | 0.0964  | -0.00367      | 0.04465       |
| Age, years                       | -0.00101 | 0.000150 | 902 | -6.74   | <0.0001 | -0.00130      | -0.00071      |
| Height, cm                       | -0.00080 | 0.000163 | 902 | -4.89   | <0.0001 | -0.00112      | -0.00048      |
| Gender (Male)                    | -0.00305 | 0.002825 | 902 | -1.08   | 0.2800  | -0.00860      | 0.002490      |
| Race (White)                     | -0.01751 | 0.002454 | 902 | -7.13   | <0.0001 | -0.02232      | -0.01269      |
| Smoking status (former)          | 0.008689 | 0.002729 | 902 | 3.18    | 0.0015  | 0.003333      | 0.01405       |
| Weight, kg                       | 0.000407 | 0.000067 | 902 | 6.07    | <0.0001 | 0.000276      | 0.000539      |

\* Predictors followed by a level in parentheses are indicators; the estimate represents the average change in the outcome for that level compared with the reference level. Other predictors are continuous.

\*\* Trace level is reference.

### Estimates

| Label                 | Estimate | SE       | DF  | t Value | Pr >  t | 95% CI, Lower | 95% CI, Upper |
|-----------------------|----------|----------|-----|---------|---------|---------------|---------------|
| Change for Trace      | -0.01476 | 0.002437 | 902 | -6.06   | <0.0001 | -0.01954      | -0.00998      |
| Change for Mild       | -0.01898 | 0.002638 | 902 | -7.19   | <0.0001 | -0.02416      | -0.01380      |
| Change for Moderate   | -0.03197 | 0.004326 | 902 | -7.39   | <0.0001 | -0.04046      | -0.02348      |
| Change for Conf./adv. | -0.01148 | 0.01158  | 902 | -0.99   | 0.3218  | -0.03420      | 0.01125       |

### Least squares means

| Phase | Emphysema presence category | Estimate | SE       | DF  | t Value | Pr >  t | 95% CI, Lower | 95% CI, Upper |
|-------|-----------------------------|----------|----------|-----|---------|---------|---------------|---------------|
| 1     | Trace                       | 0.7844   | 0.001817 | 902 | 431.74  | <0.0001 | 0.7808        | 0.7880        |
| 1     | Mild                        | 0.7699   | 0.001912 | 902 | 402.73  | <0.0001 | 0.7661        | 0.7736        |
| 1     | Moderate                    | 0.7552   | 0.003157 | 902 | 239.23  | <0.0001 | 0.7490        | 0.7614        |
| 1     | Advanced/Confluent          | 0.7489   | 0.009221 | 902 | 81.22   | <0.0001 | 0.7308        | 0.7670        |
| 2     | Trace                       | 0.7696   | 0.002405 | 902 | 320.00  | <0.0001 | 0.7649        | 0.7744        |

|   |                    |        |          |     |        |         |        |        |
|---|--------------------|--------|----------|-----|--------|---------|--------|--------|
| 2 | Mild               | 0.7509 | 0.002666 | 902 | 281.63 | <0.0001 | 0.7456 | 0.7561 |
| 2 | Moderate           | 0.7232 | 0.004329 | 902 | 167.06 | <0.0001 | 0.7147 | 0.7317 |
| 2 | Advanced/Confluent | 0.7375 | 0.01147  | 902 | 64.27  | <0.0001 | 0.7149 | 0.7600 |

Outcome: FEV1; r = 2893

### Covariance Parameter Estimates

| Covariance Parameter | Estimate |
|----------------------|----------|
| Subject              | 0.08102  |
| Study center         | 0.000950 |
| Residual             | 0.03515  |

### Type 3 Tests of Fixed Effects

| Effect                | Num DF | Den DF | F Value | Pr > F |
|-----------------------|--------|--------|---------|--------|
| Emphysema class       | 3      | 902    | 1.99    | 0.1140 |
| Phase*Emphysema class | 3      | 902    | 0.20    | 0.8961 |

### Fixed parameter (Beta) estimates

| Effect*                          | Estimate | SE       | DF  | t Value | Pr >  t | 95% CI, Lower | 95% CI, Upper |
|----------------------------------|----------|----------|-----|---------|---------|---------------|---------------|
| Intercept                        | -2.1937  | 0.2071   | 5   | -10.59  | 0.0001  | -2.7261       | -1.6613       |
| Phase (1)                        | 0.09822  | 0.06252  | 902 | 1.57    | 0.1165  | -0.02448      | 0.2209        |
| Emphysema (Mild)**               | 0.008559 | 0.07572  | 902 | 0.11    | 0.9100  | -0.1400       | 0.1572        |
| Emphysema (Mod.)**               | -0.03462 | 0.07594  | 902 | -0.46   | 0.6486  | -0.1837       | 0.1144        |
| Emphysema (Adv./Conf.)**         | -0.03051 | 0.07894  | 902 | -0.39   | 0.6992  | -0.1854       | 0.1244        |
| Phase (1)*Emphysema (Mild)       | -0.01318 | 0.06349  | 902 | -0.21   | 0.8356  | -0.1378       | 0.1114        |
| Phase (1)*Emphysema (Mod)        | -0.00121 | 0.06373  | 902 | -0.02   | 0.9849  | -0.1263       | 0.1239        |
| Phase (1)*Emphysema (Adv./Conf.) | -0.01748 | 0.06640  | 902 | -0.26   | 0.7924  | -0.1478       | 0.1128        |
| Age, years                       | -0.02704 | 0.001079 | 902 | -25.07  | <0.0001 | -0.02916      | -0.02492      |
| Height, cm                       | 0.03748  | 0.001143 | 902 | 32.79   | <0.0001 | 0.03523       | 0.03972       |
| Gender (Male)                    | 0.4480   | 0.02015  | 902 | 22.23   | <0.0001 | 0.4085        | 0.4876        |
| Race (White)                     | 0.3751   | 0.01816  | 902 | 20.66   | <0.0001 | 0.3394        | 0.4107        |
| Smoking status (former)          | 0.06588  | 0.01961  | 902 | 3.36    | 0.0008  | 0.02740       | 0.1044        |
| Weight, kg                       | -0.00446 | 0.000460 | 902 | -9.69   | <0.0001 | -0.00536      | -0.00356      |

\* Predictors followed by a level in parentheses are indicators; the estimate represents the average change in the outcome for that level compared with the reference level. Other predictors are continuous.

\*\* Trace level is reference.

### Estimates

| Label                 | Estimate | SE      | DF  | t Value | Pr >  t | 95% CI, Lower | 95% CI, Upper |
|-----------------------|----------|---------|-----|---------|---------|---------------|---------------|
| Change for Trace      | -0.08504 | 0.01380 | 902 | -6.16   | <0.0001 | -0.1121       | -0.05796      |
| Change for Mild       | -0.09701 | 0.01489 | 902 | -6.52   | <0.0001 | -0.1262       | -0.06780      |
| Change for Moderate   | -0.08074 | 0.02381 | 902 | -3.39   | 0.0007  | -0.1275       | -0.03401      |
| Change for Conf./adv. | -0.09822 | 0.06252 | 902 | -1.57   | 0.1165  | -0.2209       | 0.02448       |

### Least squares means

| Phase | Emphysema presence category | Estimate | SE      | DF  | t Value | Pr >  t | 95% CI, Lower | 95% CI, Upper |
|-------|-----------------------------|----------|---------|-----|---------|---------|---------------|---------------|
| 1     | Trace                       | 2.7463   | 0.01460 | 902 | 188.14  | <0.0001 | 2.7176        | 2.7749        |
| 1     | Mild                        | 2.7150   | 0.01514 | 902 | 179.35  | <0.0001 | 2.6853        | 2.7448        |

|   |                    |        |         |     |        |         |        |        |
|---|--------------------|--------|---------|-----|--------|---------|--------|--------|
| 1 | Moderate           | 2.7029 | 0.02298 | 902 | 117.61 | <0.0001 | 2.6578 | 2.7480 |
| 1 | Advanced/Confluent | 2.7509 | 0.06419 | 902 | 42.86  | <0.0001 | 2.6249 | 2.8769 |
| 2 | Trace              | 2.6612 | 0.01717 | 902 | 155.01 | <0.0001 | 2.6275 | 2.6949 |
| 2 | Mild               | 2.6180 | 0.01867 | 902 | 140.25 | <0.0001 | 2.5814 | 2.6547 |
| 2 | Moderate           | 2.6221 | 0.02869 | 902 | 91.41  | <0.0001 | 2.5659 | 2.6784 |
| 2 | Advanced/Confluent | 2.6527 | 0.07494 | 902 | 35.40  | <0.0001 | 2.5056 | 2.7997 |

Outcome: 6MWD, r = 2884

### Covariance Parameter Estimates

| Covariance Parameter | Estimate |
|----------------------|----------|
| Subject              | 40271    |
| Study center         | 24438    |
| Residual             | 57570    |

### Type 3 Tests of Fixed Effects

| Effect                | Num DF | Den DF | F Value | Pr > F |
|-----------------------|--------|--------|---------|--------|
| Emphysema class       | 3      | 900    | 5.39    | 0.0011 |
| Phase*Emphysema class | 3      | 900    | 0.16    | 0.9242 |

### Fixed parameter (Beta) estimates

| Effect*                          | Estimate | SE      | DF  | t Value | Pr >  t | 95% CI, Lower | 95% CI, Upper |
|----------------------------------|----------|---------|-----|---------|---------|---------------|---------------|
| Intercept                        | 907.06   | 192.16  | 5   | 4.72    | 0.0052  | 413.09        | 1401.03       |
| Phase (1)                        | 30.1081  | 77.3083 | 900 | 0.39    | 0.6970  | -121.62       | 181.83        |
| Emphysema (Mild)**               | 179.61   | 75.1538 | 900 | 2.39    | 0.0171  | 32.1099       | 327.10        |
| Emphysema (Mod.)**               | 164.46   | 75.4102 | 900 | 2.18    | 0.0295  | 16.4572       | 312.46        |
| Emphysema (Adv./Conf.)**         | 117.89   | 78.4272 | 900 | 1.50    | 0.1331  | -36.0302      | 271.81        |
| Phase (1)*Emphysema (Mild)       | 6.2789   | 78.6483 | 900 | 0.08    | 0.9364  | -148.08       | 160.63        |
| Phase (1)*Emphysema (Mod)        | 20.1879  | 78.9250 | 900 | 0.26    | 0.7982  | -134.71       | 175.09        |
| Phase (1)*Emphysema (Adv./Conf.) | 20.1736  | 82.0949 | 900 | 0.25    | 0.8059  | -140.95       | 181.29        |
| Age, years                       | -10.3309 | 0.9703  | 900 | -10.65  | <0.0001 | -12.2353      | -8.4265       |
| Height, cm                       | 6.4502   | 1.0325  | 900 | 6.25    | <0.0001 | 4.4237        | 8.4766        |
| Gender (Male)                    | 64.8046  | 17.8825 | 900 | 3.62    | 0.0003  | 29.7084       | 99.9008       |
| Race (White)                     | 87.9292  | 16.8964 | 900 | 5.20    | <0.0001 | 54.7683       | 121.09        |
| Smoking status (former)          | 130.97   | 17.3203 | 900 | 7.56    | <0.0001 | 96.9803       | 164.97        |
| Weight, kg                       | -3.9350  | 0.4273  | 900 | -9.21   | <0.0001 | -4.7736       | -3.0963       |

\* Predictors followed by a level in parentheses are indicators; the estimate represents the average change in the outcome for that level compared with the reference level. Other predictors are continuous.

\*\* Trace level is reference.

### Estimates

| Label                 | Estimate | SE      | DF  | t Value | Pr >  t | 95% CI, Lower | 95% CI, Upper |
|-----------------------|----------|---------|-----|---------|---------|---------------|---------------|
| Change for Trace      | -36.3871 | 16.2141 | 900 | -2.24   | 0.0251  | -68.2089      | -4.5653       |
| Change for Mild       | -50.2960 | 17.5097 | 900 | -2.87   | 0.0042  | -84.6607      | -15.9314      |
| Change for Moderate   | -50.2817 | 28.5230 | 900 | -1.76   | 0.0783  | -106.26       | 5.6977        |
| Change for Conf./adv. | -30.1081 | 77.3083 | 900 | -0.39   | 0.6970  | -181.83       | 121.62        |



### Least squares means

| Phase | Emphysema presence category | Estimate | SE      | DF  | t Value | Pr >  t | 95% CI, Lower | 95% CI, Upper |
|-------|-----------------------------|----------|---------|-----|---------|---------|---------------|---------------|
| 1     | Trace                       | 1429.17  | 36.9892 | 900 | 38.64   | <0.0001 | 1356.58       | 1501.77       |
| 1     | Mild                        | 1427.93  | 37.1511 | 900 | 38.44   | <0.0001 | 1355.02       | 1500.85       |
| 1     | Moderate                    | 1381.35  | 40.3492 | 900 | 34.23   | <0.0001 | 1302.16       | 1460.54       |
| 1     | Advanced/Confluent          | 1243.29  | 68.2762 | 900 | 18.21   | <0.0001 | 1109.29       | 1377.29       |
| 2     | Trace                       | 1392.79  | 38.4551 | 900 | 36.22   | <0.0001 | 1317.31       | 1468.26       |
| 2     | Mild                        | 1377.64  | 39.1020 | 900 | 35.23   | <0.0001 | 1300.90       | 1454.38       |
| 2     | Moderate                    | 1331.07  | 44.7195 | 900 | 29.76   | <0.0001 | 1243.30       | 1418.84       |
| 2     | Advanced/Confluent          | 1213.18  | 81.7811 | 900 | 14.83   | <0.0001 | 1052.68       | 1373.68       |

Outcome: Total SGRQ, r = 2911

### Covariance Parameter Estimates

| Covariance Parameter | Estimate |
|----------------------|----------|
| Subject              | 176.23   |
| Study center         | 28.1207  |
| Residual             | 116.10   |

### Type 3 Tests of Fixed Effects

| Effect                | Num DF | Den DF | F Value | Pr > F |
|-----------------------|--------|--------|---------|--------|
| Emphysema class       | 3      | 920    | 5.95    | 0.0005 |
| Phase*Emphysema class | 3      | 920    | 0.42    | 0.7399 |

### Fixed parameter (Beta) estimates

| Effect*                          | Estimate | SE      | DF  | t Value | Pr >  t | 95% CI, Lower | 95% CI, Upper |
|----------------------------------|----------|---------|-----|---------|---------|---------------|---------------|
| Intercept                        | 68.0873  | 10.5065 | 5   | 6.48    | 0.0013  | 41.0794       | 95.0952       |
| Phase (1)                        | 0.7765   | 3.5523  | 920 | 0.22    | 0.8270  | -6.1951       | 7.7481        |
| Emphysema (Mild)**               | -3.6200  | 3.9252  | 920 | -0.92   | 0.3566  | -11.3235      | 4.0834        |
| Emphysema (Mod.)**               | -1.9595  | 3.9375  | 920 | -0.50   | 0.6188  | -9.6870       | 5.7680        |
| Emphysema (Adv./Conf.)**         | 1.0128   | 4.0897  | 920 | 0.25    | 0.8045  | -7.0134       | 9.0391        |
| Phase (1)*Emphysema (Mild)       | -1.4455  | 3.6093  | 920 | -0.40   | 0.6889  | -8.5290       | 5.6380        |
| Phase (1)*Emphysema (Mod)        | -2.1628  | 3.6229  | 920 | -0.60   | 0.5507  | -9.2728       | 4.9473        |
| Phase (1)*Emphysema (Adv./Conf.) | -0.7331  | 3.7674  | 920 | -0.19   | 0.8458  | -8.1268       | 6.6605        |
| Age, years                       | -0.1232  | 0.05429 | 920 | -2.27   | 0.0235  | -0.2298       | -0.01667      |
| Height, cm                       | -0.3235  | 0.05733 | 920 | -5.64   | <0.0001 | -0.4360       | -0.2110       |
| Gender (Male)                    | -3.6872  | 1.0028  | 920 | -3.68   | 0.0002  | -5.6552       | -1.7192       |
| Race (White)                     | 0.08603  | 0.9451  | 920 | 0.09    | 0.9275  | -1.7687       | 1.9408        |
| Smoking status (former)          | -6.0116  | 0.9759  | 920 | -6.16   | <0.0001 | -7.9269       | -4.0963       |
| Weight, kg                       | 0.2601   | 0.02336 | 920 | 11.13   | <0.0001 | 0.2142        | 0.3059        |

\* Predictors followed by a level in parentheses are indicators; the estimate represents the average change in the outcome for that level compared with the reference level. Other predictors are continuous.

\*\* Trace level is reference.

### Estimates

| Label            | Estimate | SE     | DF  | t Value | Pr >  t | 95% CI, Lower | 95% CI, Upper |
|------------------|----------|--------|-----|---------|---------|---------------|---------------|
| Change for Trace | 0.6690   | 0.7620 | 920 | 0.88    | 0.3802  | -0.8265       | 2.1645        |
| Change for Mild  | 1.3863   | 0.8229 | 920 | 1.68    | 0.0924  | -0.2287       | 3.0012        |

|                       |          |        |     |       |        |         |        |
|-----------------------|----------|--------|-----|-------|--------|---------|--------|
| Change for Moderate   | -0.04338 | 1.3194 | 920 | -0.03 | 0.9738 | -2.6328 | 2.5461 |
| Change for Conf./adv. | -0.7765  | 3.5523 | 920 | -0.22 | 0.8270 | -7.7481 | 6.1951 |

### Least squares means

| Phase | Emphysema presence category | Estimate | SE     | DF  | t Value | Pr >  t | 95% CI, Lower | 95% CI, Upper |
|-------|-----------------------------|----------|--------|-----|---------|---------|---------------|---------------|
| 1     | Trace                       | 17.6598  | 1.3800 | 920 | 12.80   | <0.0001 | 14.9515       | 20.3680       |
| 1     | Mild                        | 18.6030  | 1.3925 | 920 | 13.36   | <0.0001 | 15.8702       | 21.3358       |
| 1     | Moderate                    | 23.0050  | 1.6380 | 920 | 14.04   | <0.0001 | 19.7903       | 26.2197       |
| 1     | Advanced/Confluent          | 22.7253  | 3.4284 | 920 | 6.63    | <0.0001 | 15.9968       | 29.4538       |
| 2     | Trace                       | 18.3288  | 1.4673 | 920 | 12.49   | <0.0001 | 15.4491       | 21.2084       |
| 2     | Mild                        | 19.9893  | 1.5131 | 920 | 13.21   | <0.0001 | 17.0198       | 22.9588       |
| 2     | Moderate                    | 22.9616  | 1.8795 | 920 | 12.22   | <0.0001 | 19.2730       | 26.6502       |
| 2     | Advanced/Confluent          | 21.9488  | 4.0510 | 920 | 5.42    | <0.0001 | 13.9985       | 29.8991       |

Outcome: SF26gen, r = 1870

### Covariance Parameter Estimates

| Covariance Parameter | Estimate |
|----------------------|----------|
| Subject              | 54.7082  |
| Study center         | 0.7058   |
| Residual             | 36.9503  |

### Type 3 Tests of Fixed Effects

| Effect                | Num DF | Den DF | F Value | Pr > F |
|-----------------------|--------|--------|---------|--------|
| Emphysema class       | 3      | 489    | 4.09    | 0.0070 |
| Phase*Emphysema class | 3      | 489    | 0.69    | 0.5582 |

### Fixed parameter (Beta) estimates

| Effect*                          | Estimate | SE      | DF  | t Value | Pr >  t | 95% CI, Lower | 95% CI, Upper |
|----------------------------------|----------|---------|-----|---------|---------|---------------|---------------|
| Intercept                        | 30.2757  | 6.9620  | 2   | 4.35    | 0.0490  | 0.3206        | 60.2308       |
| Phase (1)                        | -0.6646  | 2.5159  | 489 | -0.26   | 0.7918  | -5.6079       | 4.2787        |
| Emphysema (Mild)**               | -0.1498  | 2.2855  | 489 | -0.07   | 0.9478  | -4.6405       | 4.3408        |
| Emphysema (Mod.)**               | -0.3973  | 2.2934  | 489 | -0.17   | 0.8625  | -4.9035       | 4.1089        |
| Emphysema (Adv./Conf.)**         | -2.9714  | 2.3818  | 489 | -1.25   | 0.2128  | -7.6512       | 1.7084        |
| Phase (1)*Emphysema (Mild)       | 2.1776   | 2.5526  | 489 | 0.85    | 0.3940  | -2.8379       | 7.1931        |
| Phase (1)*Emphysema (Mod)        | 1.3918   | 2.5617  | 489 | 0.54    | 0.5872  | -3.6416       | 6.4252        |
| Phase (1)*Emphysema (Adv./Conf.) | 2.3728   | 2.6611  | 489 | 0.89    | 0.3730  | -2.8557       | 7.6013        |
| Age, years                       | 0.1284   | 0.03651 | 489 | 3.52    | 0.0005  | 0.05669       | 0.2001        |
| Height, cm                       | 0.08367  | 0.03889 | 489 | 2.15    | 0.0319  | 0.007270      | 0.1601        |
| Gender (Male)                    | 0.008784 | 0.6774  | 489 | 0.01    | 0.9897  | -1.3223       | 1.3398        |
| Race (White)                     | 0.3267   | 0.6063  | 489 | 0.54    | 0.5903  | -0.8646       | 1.5179        |
| Smoking status (former)          | 3.3771   | 0.6448  | 489 | 5.24    | <0.0001 | 2.1102        | 4.6441        |
| Weight, kg                       | -0.07573 | 0.1582  | 489 | -4.79   | <0.0001 | -0.1068       | -0.04465      |

\* Predictors followed by a level in parentheses are indicators; the estimate represents the average change in the outcome for that level compared with the reference level. Other predictors are continuous.

\*\* Trace level is reference.

## Estimates

| Label                 | Estimate | SE     | DF  | t Value | Pr >  t | 95% CI, Lower | 95% CI, Upper |
|-----------------------|----------|--------|-----|---------|---------|---------------|---------------|
| Change for Trace      | -1.5130  | 0.5318 | 489 | -2.85   | 0.0046  | -2.5579       | -0.4681       |
| Change for Mild       | -0.7272  | 0.5695 | 489 | -1.28   | 0.2023  | -1.8462       | 0.3918        |
| Change for Moderate   | -1.7082  | 0.9171 | 489 | -1.86   | 0.0631  | -3.5101       | 0.09368       |
| Change for Conf./adv. | 0.6646   | 2.5159 | 489 | 0.26    | 0.7918  | -4.2787       | 5.6079        |

## Least squares means

| Phase | Emphysema presence category | Estimate | SE     | DF  | t Value | Pr >  t | 95% CI, Lower | 95% CI, Upper |
|-------|-----------------------------|----------|--------|-----|---------|---------|---------------|---------------|
| 1     | Trace                       | 49.4016  | 0.5268 | 489 | 93.78   | <0.0001 | 48.3666       | 50.4366       |
| 1     | Mild                        | 48.3683  | 0.5419 | 489 | 89.26   | <0.0001 | 47.3036       | 49.4329       |
| 1     | Moderate                    | 46.7752  | 0.8398 | 489 | 55.70   | <0.0001 | 45.1251       | 48.4253       |
| 1     | Advanced/Confluent          | 47.3738  | 2.3603 | 489 | 20.07   | <0.0001 | 42.7363       | 52.0113       |
| 2     | Trace                       | 47.8886  | 0.5074 | 489 | 94.38   | <0.0001 | 46.8916       | 48.8856       |
| 2     | Mild                        | 47.6411  | 0.5549 | 489 | 85.85   | <0.0001 | 46.5507       | 48.7314       |
| 2     | Moderate                    | 45.0670  | 0.8554 | 489 | 52.69   | <0.0001 | 43.3864       | 46.7476       |
| 2     | Advanced/Confluent          | 48.0384  | 2.2551 | 489 | 21.30   | <0.0001 | 43.6076       | 52.4693       |

## Appendix E3

Table 5 extended output for Cox proportional hazards model fit of 'Days followed', Breslow method used for ties.

### Summary of the Number of Event and Censored Values

| Total | Event | Censored | % Censored |
|-------|-------|----------|------------|
| 4095  | 293   | 3802     | 92.84      |

### Model Fit Statistics

| Criterion | Without Covariates | With Covariates |
|-----------|--------------------|-----------------|
| -2 LOG L  | 4741.646           | 4623.474        |
| AIC       | 4741.646           | 4635.474        |
| SBC       | 4741.646           | 4657.555        |

### Testing Global Null Hypothesis: BETA = 0

| Test             | Chi-Square | DF | Pr > ChiSq |
|------------------|------------|----|------------|
| Likelihood Ratio | 118.1714   | 6  | <0.0001    |
| Score            | 112.1320   | 6  | <0.0001    |
| Wald             | 109.2573   | 6  | <0.0001    |

| Parameter                | DF | Parameter Estimate | SE      | Chi-Square | Pr > ChiSq | Hazard Ratio | 95% Hazard Ratio Confidence Limits |       |
|--------------------------|----|--------------------|---------|------------|------------|--------------|------------------------------------|-------|
| Emphysema (presence)     | 1  | 0.17158            | 0.12039 | 2.0313     | 0.1541     | 1.187        | 0.938                              | 1.503 |
| Age, years               | 1  | 0.05090            | 0.00822 | 38.3833    | <0.0001    | 1.052        | 1.035                              | 1.069 |
| Height, cm               | 1  | -0.00808           | 0.00849 | 0.9055     | 0.3413     | 0.992        | 0.976                              | 1.009 |
| Gender (Male)            | 1  | 0.87321            | 0.16946 | 26.5539    | <0.0001    | 2.395        | 1.718                              | 3.338 |
| Race (White)             | 1  | -0.23214           | 0.13611 | 2.9090     | 0.0881     | 0.793        | 0.607                              | 1.035 |
| Smoking status (current) | 1  | 0.97404            | 0.15661 | 38.6806    | <0.0001    | 2.649        | 1.949                              | 3.600 |
